# Supplementary material for: Host Heterogeneous Ribonucleoprotein K (hnRNP K) as a Potential Target to Suppress Hepatitis B Virus Replication
Source: PubMed Central journal article supplement (PMC1181871; doi:10.1371/journal.pmed.0020163), 2005-07-26
Supplement: pmed.0020163.sg001.pdf [file pmed.0020163.sg001.pdf]

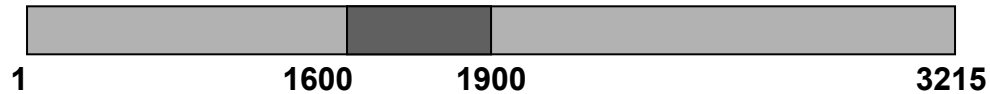

ATCC clone available in pBR325. EcoRI site at both ends.  
 Primers designed to amplify 2 fragments: 1-1900 and 1600-3215.  
 Ligation using internal EcoRI (1/3215) ensures continuous viral ORFs.

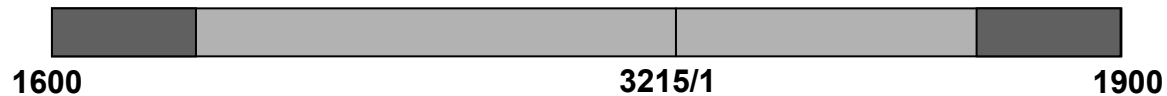

Replicative clone with promoter (1600-1900) at its 5' end and termination region (1600-1900) at its 3' end.  
 The construct was cloned into NruI site in pcDNA3.1. Viral transcription is under its own promoter, as NruI is outside the pCMV promoter.

**Supporting Information Figure S1.** Description of cloning of the full-length replication HBV construct.
