# Supplementary material for: Host Heterogeneous Ribonucleoprotein K (hnRNP K) as a Potential Target to Suppress Hepatitis B Virus Replication
Source: PubMed Central journal article supplement (PMC1181871; doi:10.1371/journal.pmed.0020163), 2005-07-26
Supplement: pmed.0020163.sg002.pdf [file pmed.0020163.sg002.pdf]

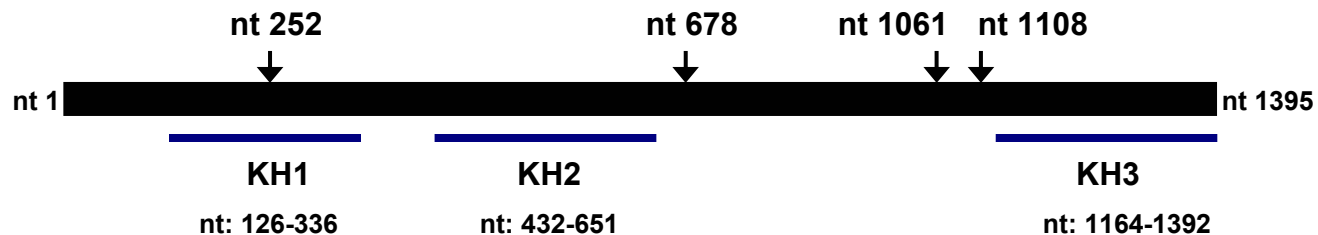

| Location (nt) | AA change | Frequency     | Source         |
|---------------|-----------|---------------|----------------|
| 252C>T        | Silent    | 2 samples     | this study     |
| 678C>T        | Pro>Ser   | not validated | dbSNP:11548847 |
| 1061A>C       | Pro>Gln   | not validated | dbSNP:11548850 |
| 1108 to 1122  | Deletion  | 2 samples     | this study     |

**Supporting Information Figure S2.** SNPs (single nucleotide polymorphisms) in the hnRNP K gene were extracted from Ensembl ([www.ensembl.org](http://www.ensembl.org)) and Celera databases. In addition, we cloned and sequenced the hnRNP K full length cDNA from 18 normal volunteers. Only 2 SNPs were reported from the dbSNP and both have not been validated. We have found a novel SNP at nt252 that involves a C>T change, but is non-synonymous. An interesting deletion was observed in 2 different samples in which a 15 base deletion was found just upstream of the KH3 domain (nt1108 to nt1122, nt: ATGATTATTCCTATG). There are a number of SNPs in the UTR (untranslated region) and intronic regions reported in the public databases, but none have been validated (results not shown).
